# Supplementary material for: Association of the Alzheimer's Gene SORL1 With Hippocampal Volume in Young, Healthy Adults
Source: Atypon-hosted journal article supplement (doi:10.1176/appi.ajp.2011.10101509), 2011-07-06
Supplement: ajp_168_10_1083_01.pdf [file ajp_168_10_1083_01.pdf]

**Supplementary Table 1.** SNP-by-SNP association analysis of the *SORL1* gene with hippocampal volume in young healthy individuals from the BIG study (117 SNPs included) in the 1.5T, 3.0T and combined samples. Significantly associated SNPs in **bold** (E p<0.05).

| SNP        | position  | A1 | A2 | 1.5T |      |      |   |      |      |      | 3.0T |      |      |   |      |      |      | Combined |      |      |   |      |      |      |
|------------|-----------|----|----|------|------|------|---|------|------|------|------|------|------|---|------|------|------|----------|------|------|---|------|------|------|
|            |           |    |    | MAF  | P    | E    | B | M11  | M12  | M22  | MAF  | P    | E    | B | M11  | M12  | M22  | MAF      | P    | E    | B | M11  | M12  | M22  |
| rs6589878  | 120728302 | A  | C  | 0.05 | 0.79 | 1    | 1 | 5.25 | 4.88 | 4.94 | 0.05 | 0.51 | 1    | 1 | NA   | 4.65 | 4.75 | 0.051    | 0.84 | 1    | 1 | 5.25 | 4.75 | 4.84 |
| rs4936618  | 120729206 | G  | T  | 0.19 | 0.18 | 1    | 1 | 5.11 | 4.92 | 4.94 | 0.18 | 0.60 | 1    | 1 | 4.63 | 4.72 | 4.76 | 0.187    | 0.52 | 1    | 1 | 4.96 | 4.81 | 4.85 |
| rs891437   | 120729986 | T  | C  | 0.32 | 0.42 | 1    | 1 | 5.08 | 4.93 | 4.92 | 0.32 | 0.53 | 1    | 1 | 4.53 | 4.79 | 4.73 | 0.318    | 0.97 | 1    | 1 | 4.83 | 4.85 | 4.82 |
| rs12417012 | 120731232 | A  | G  | 0.04 | 0.70 | 1    | 1 | 5.50 | 4.86 | 4.95 | 0.03 | 0.40 | 1    | 1 | NA   | 4.68 | 4.75 | 0.030    | 0.37 | 1    | 1 | 5.50 | 4.78 | 4.84 |
| rs2043107  | 120735412 | C  | T  | 0.03 | 0.23 | 1    | 1 | NA   | 5.21 | 4.93 | 0.02 | 0.36 | 1    | 1 | 5.00 | 4.57 | 4.75 | 0.026    | 0.94 | 1    | 1 | 5.00 | 4.89 | 4.83 |
| rs10750187 | 120735435 | G  | A  | 0.22 | 0.06 | 0.93 | 1 | 5.13 | 4.95 | 4.92 | 0.21 | 0.38 | 1    | 1 | 4.54 | 4.71 | 4.76 | 0.215    | 0.46 | 1    | 1 | 4.92 | 4.82 | 4.84 |
| rs4936621  | 120738021 | G  | A  | 0.06 | 0.44 | 1    | 1 | 5.50 | 4.89 | 4.94 | 0.06 | 0.90 | 1    | 1 | NA   | 4.69 | 4.75 | 0.057    | 0.61 | 1    | 1 | 5.50 | 4.78 | 4.84 |
| rs10790443 | 120739341 | T  | G  | 0.32 | 0.27 | 1    | 1 | 5.10 | 4.94 | 4.91 | 0.32 | 0.53 | 1    | 1 | 4.54 | 4.79 | 4.73 | 0.321    | 0.80 | 1    | 1 | 4.84 | 4.86 | 4.82 |
| rs10790444 | 120740339 | A  | T  | 0.22 | 0.06 | 0.92 | 1 | 5.13 | 4.95 | 4.92 | 0.21 | 0.33 | 1    | 1 | 4.50 | 4.71 | 4.77 | 0.216    | 0.49 | 1    | 1 | 4.89 | 4.82 | 4.84 |
| rs1529578  | 120740881 | C  | A  | 0.06 | 0.45 | 1    | 1 | 5.50 | 4.89 | 4.94 | 0.06 | 0.90 | 1    | 1 | NA   | 4.69 | 4.74 | 0.057    | 0.61 | 1    | 1 | 5.50 | 4.78 | 4.84 |
| rs1529579  | 120741081 | T  | G  | 0.22 | 0.06 | 0.93 | 1 | 5.13 | 4.95 | 4.92 | 0.21 | 0.36 | 1    | 1 | 4.50 | 4.72 | 4.76 | 0.216    | 0.48 | 1    | 1 | 4.89 | 4.83 | 4.84 |
| rs4935769  | 120742044 | G  | A  | 0.32 | 0.31 | 1    | 1 | 5.10 | 4.93 | 4.92 | 0.32 | 0.55 | 1    | 1 | 4.54 | 4.79 | 4.73 | 0.318    | 0.84 | 1    | 1 | 4.84 | 4.85 | 4.82 |
| rs4936625  | 120742455 | C  | T  | 0.20 | 0.33 | 1    | 1 | 5.15 | 4.90 | 4.94 | 0.19 | 0.21 | 1    | 1 | 4.55 | 4.69 | 4.77 | 0.191    | 0.84 | 1    | 1 | 4.88 | 4.80 | 4.85 |
| rs72991    | 120748926 | A  | G  | 0.28 | 0.26 | 1    | 1 | 5.11 | 4.93 | 4.92 | 0.29 | 0.76 | 1    | 1 | 4.58 | 4.77 | 4.74 | 0.286    | 0.61 | 1    | 1 | 4.87 | 4.84 | 4.83 |
| rs733435   | 120748971 | T  | G  | 0.03 | 0.23 | 1    | 1 | NA   | 5.21 | 4.93 | 0.02 | 0.35 | 1    | 1 | 5.00 | 4.50 | 4.75 | 0.024    | 0.92 | 1    | 1 | 5.00 | 4.89 | 4.83 |
| rs297526   | 120749220 | G  | C  | 0.32 | 0.37 | 1    | 1 | 5.08 | 4.94 | 4.93 | 0.34 | 0.64 | 1    | 1 | 4.55 | 4.79 | 4.72 | 0.329    | 0.81 | 1    | 1 | 4.84 | 4.85 | 4.82 |
| rs7116595  | 120751341 | T  | G  | 0.27 | 0.99 | 1    | 1 | 4.97 | 4.92 | 4.94 | 0.26 | 0.04 | 0.86 | 1 | 4.35 | 4.73 | 4.78 | 0.26     | 0.14 | 1.00 | 1 | 4.68 | 4.82 | 4.86 |
| rs297491   | 120760534 | T  | C  | 0.27 | 0.46 | 1    | 1 | 5.03 | 4.96 | 4.92 | 0.26 | 0.04 | 0.83 | 1 | 4.38 | 4.75 | 4.77 | 0.27     | 0.33 | 1    | 1 | 4.72 | 4.85 | 4.84 |
| rs6589880  | 120760909 | T  | C  | 0.25 | 0.77 | 1    | 1 | 5.00 | 4.91 | 4.96 | 0.23 | 0.03 | 0.79 | 1 | 4.33 | 4.75 | 4.76 | 0.24     | 0.08 | 0.96 | 1 | 4.67 | 4.83 | 4.85 |
| rs212501   | 120761319 | A  | G  | 0.33 | 0.97 | 1    | 1 | 5.04 | 4.94 | 4.92 | 0.34 | 0.19 | 1    | 1 | 4.50 | 4.79 | 4.74 | 0.337    | 0.33 | 1    | 1 | 4.78 | 4.86 | 4.83 |
| rs297487   | 120762304 | A  | C  | 0.03 | 0.23 | 1    | 1 | NA   | 5.21 | 4.93 | 0.02 | 0.35 | 1    | 1 | 5.00 | 4.50 | 4.75 | 0.024    | 0.92 | 1    | 1 | 5.00 | 4.89 | 4.83 |
| rs2370386  | 120763878 | G  | C  | 0.02 | 0.04 | 0.87 | 1 | NA   | 5.23 | 4.93 | 0.02 | 0.83 | 1    | 1 | NA   | 4.71 | 4.74 | 0.023    | 0.11 | 1    | 1 | NA   | 4.98 | 4.83 |
| rs903243   | 120764316 | C  | G  | 0.35 | 0.81 | 1    | 1 | 5.02 | 4.94 | 4.92 | 0.36 | 0.16 | 1    | 1 | 4.51 | 4.79 | 4.74 | 0.36     | 0.38 | 1    | 1 | 4.78 | 4.86 | 4.83 |
| rs2453146  | 120764691 | G  | A  | 0.27 | 0.46 | 1    | 1 | 5.06 | 4.97 | 4.89 | 0.29 | 0.27 | 1    | 1 | 4.55 | 4.78 | 4.74 | 0.281    | 0.72 | 1    | 1 | 4.79 | 4.87 | 4.81 |
| rs662738   | 120765567 | G  | A  | 0.29 | 0.65 | 1    | 1 | 5.07 | 4.89 | 4.96 | 0.31 | 0.29 | 1    | 1 | 4.52 | 4.79 | 4.73 | 0.299    | 0.26 | 1    | 1 | 4.79 | 4.84 | 4.84 |
| rs297502   | 120769026 | A  | G  | 0.03 | 0.23 | 1    | 1 | NA   | 5.21 | 4.93 | 0.02 | 0.35 | 1    | 1 | 5.00 | 4.50 | 4.75 | 0.024    | 0.92 | 1    | 1 | 5.00 | 4.89 | 4.83 |

|                  |           |   |   |      |             |             |             |      |      |      |      |             |             |             |      |      |      |       |             |             |             |      |      |      |
|------------------|-----------|---|---|------|-------------|-------------|-------------|------|------|------|------|-------------|-------------|-------------|------|------|------|-------|-------------|-------------|-------------|------|------|------|
| rs297503         | 120769636 | A | G | 0.30 | 0.51        | 1           | 1           | 5.09 | 4.94 | 4.91 | 0.31 | 0.25        | 1           | 1           | 4.56 | 4.77 | 4.74 | 0.306 | 0.70        | 1           | 1           | 4.84 | 4.85 | 4.83 |
| rs747220         | 120769768 | A | G | 0.03 | 0.23        | 1           | 1           | NA   | 5.21 | 4.93 | 0.02 | 0.35        | 1           | 1           | 5.00 | 4.50 | 4.75 | 0.024 | 0.92        | 1           | 1           | 5.00 | 4.89 | 4.83 |
| rs12290188       | 120771229 | C | A | 0.04 | 0.94        | 1           | 1           | NA   | 4.94 | 4.94 | 0.04 | 0.80        | 1           | 1           | 5.00 | 4.66 | 4.74 | 0.039 | 0.79        | 1           | 1           | 5.00 | 4.80 | 4.84 |
| rs297505         | 120772695 | A | T | 0.08 | 0.60        | 1           | 1           | 4.00 | 5.06 | 4.92 | 0.09 | 0.09        | 0.98        | 1           | 5.00 | 4.85 | 4.71 | 0.08  | 0.11        | 0.99        | 1           | 4.91 | 4.96 | 4.81 |
| rs297510         | 120777056 | T | A | 0.05 | 0.14        | 1           | 1           | 4.00 | 5.12 | 4.93 | 0.05 | 0.75        | 1           | 1           | 4.50 | 4.90 | 4.72 | 0.052 | 0.22        | 1           | 1           | 4.33 | 5.00 | 4.82 |
| rs297511         | 120777561 | T | A | 0.02 | 0.57        | 1           | 1           | NA   | 4.88 | 4.94 | 0.02 | 0.65        | 1           | 1           | NA   | 4.94 | 4.73 | 0.017 | 0.48        | 1           | 1           | NA   | 4.91 | 4.83 |
| rs297513         | 120780516 | C | T | 0.02 | 0.24        | 1           | 1           | NA   | 5.00 | 4.94 | 0.01 | 0.99        | 1           | 1           | NA   | 4.79 | 4.73 | 0.016 | 0.41        | 1           | 1           | NA   | 4.90 | 4.83 |
| rs297517         | 120799570 | A | C | 0.36 | 0.87        | 1           | 1           | 4.90 | 4.98 | 4.92 | 0.35 | 0.12        | 1           | 1           | 4.72 | 4.68 | 4.80 | 0.36  | 0.22        | 1           | 1           | 4.81 | 4.82 | 4.86 |
| rs17125331       | 120807029 | G | T | 0.20 | 0.11        | 1           | 1           | 4.76 | 4.82 | 5.01 | 0.21 | 0.97        | 1           | 1           | 4.76 | 4.72 | 4.75 | 0.204 | 0.26        | 1           | 1           | 4.76 | 4.76 | 4.88 |
| rs17125333       | 120807856 | T | C | 0.20 | 0.08        | 0.97        | 1           | 4.76 | 4.82 | 5.02 | 0.22 | 0.81        | 1           | 1           | 4.76 | 4.73 | 4.74 | 0.211 | 0.29        | 1           | 1           | 4.76 | 4.77 | 4.88 |
| rs17125336       | 120808416 | G | A | 0.20 | 0.10        | 1           | 1           | 4.76 | 4.82 | 5.01 | 0.21 | 0.97        | 1           | 1           | 4.76 | 4.72 | 4.75 | 0.205 | 0.25        | 1           | 1           | 4.76 | 4.77 | 4.88 |
| rs17125342       | 120813518 | G | A | 0.05 | 0.55        | 1           | 1           | 5.00 | 4.84 | 4.95 | 0.05 | 0.03        | 0.73        | 1           | 4.00 | 4.49 | 4.77 | 0.05  | 0.04        | 0.88        | 1           | 4.33 | 4.66 | 4.86 |
| rs668053         | 120813735 | C | T | 0.45 | 0.87        | 1           | 1           | 4.97 | 4.96 | 4.91 | 0.46 | 0.63        | 1           | 1           | 4.71 | 4.72 | 4.78 | 0.457 | 0.80        | 1           | 1           | 4.84 | 4.83 | 4.84 |
| rs11218292       | 120815774 | C | T | 0.18 | 0.26        | 1           | 1           | 5.15 | 4.82 | 4.99 | 0.20 | 0.51        | 1           | 1           | 4.73 | 4.70 | 4.76 | 0.190 | 0.23        | 1           | 1           | 4.93 | 4.75 | 4.87 |
| rs4935774        | 120826964 | T | C | 0.23 | 0.07        | 0.95        | 1           | 4.77 | 4.85 | 5.01 | 0.25 | 0.26        | 1           | 1           | 4.86 | 4.75 | 4.72 | 0.242 | 0.64        | 1           | 1           | 4.81 | 4.80 | 4.86 |
| rs661057         | 120834164 | A | G | 0.41 | 0.94        | 1           | 1           | 4.92 | 4.94 | 4.95 | 0.48 | 0.01        | 0.39        | 1           | 4.84 | 4.76 | 4.62 | 0.45  | 0.05        | 0.89        | 1           | 4.87 | 4.84 | 4.80 |
| rs3862605        | 120834251 | T | C | 0.33 | 0.08        | 0.97        | 1           | 5.00 | 5.03 | 4.82 | 0.30 | 0.05        | 0.89        | 1           | 4.53 | 4.75 | 4.77 | 0.31  | 0.83        | 1           | 1           | 4.80 | 4.89 | 4.79 |
| rs1784934        | 120843203 | G | A | 0.35 | 0.59        | 1           | 1           | 4.90 | 4.94 | 4.96 | 0.39 | 0.02        | 0.66        | 1           | 4.86 | 4.75 | 4.67 | 0.37  | 0.04        | 0.82        | 1           | 4.87 | 4.84 | 4.82 |
| rs676160         | 120845443 | A | G | 0.09 | 0.70        | 1           | 1           | 4.75 | 4.96 | 4.94 | 0.09 | 0.91        | 1           | 1           | 5.33 | 4.61 | 4.76 | 0.087 | 0.72        | 1           | 1           | 5.00 | 4.78 | 4.85 |
| <b>rs3781826</b> | 120848256 | A | T | 0.02 | <b>0.00</b> | <b>0.01</b> | <b>0.01</b> | NA   | 4.43 | 4.96 | 0.02 | 0.71        | 1           | 1           | NA   | 4.74 | 4.74 | 0.020 | 0.03        | 0.81        | 1           | NA   | 4.62 | 4.84 |
| rs12276905       | 120861389 | T | C | 0.09 | 0.50        | 1           | 1           | 4.75 | 4.95 | 4.94 | 0.09 | 0.91        | 1           | 1           | 5.33 | 4.61 | 4.76 | 0.088 | 0.57        | 1           | 1           | 5.00 | 4.77 | 4.84 |
| <b>rs676759</b>  | 120864475 | A | G | 0.40 | 0.21        | 1           | 1           | 4.94 | 4.94 | 4.94 | 0.42 | 0.00        | 0.07        | 0.15        | 4.89 | 4.73 | 4.67 | 0.41  | 0.00        | 0.06        | 0.11        | 4.91 | 4.83 | 4.80 |
| <b>rs560573</b>  | 120866094 | A | T | 0.41 | 0.16        | 1           | 1           | 4.96 | 4.94 | 4.94 | NA   | NA          | NA          | NA          | NA   | NA   | NA   | 0.42  | <b>0.00</b> | <b>0.02</b> | <b>0.04</b> | 4.93 | 4.84 | 4.79 |
| rs2298525        | 120866225 | G | A | 0.10 | 0.79        | 1           | 1           | 4.67 | 4.95 | 4.95 | 0.09 | 0.83        | 1           | 1           | 5.33 | 4.60 | 4.76 | 0.092 | 0.73        | 1           | 1           | 5.00 | 4.77 | 4.85 |
| rs985421         | 120867526 | C | T | 0.02 | 0.06        | 0.94        | 1           | NA   | 4.72 | 4.95 | 0.02 | 0.75        | 1           | 1           | NA   | 4.76 | 4.74 | 0.021 | 0.27        | 1           | 1           | NA   | 4.74 | 4.84 |
| <b>rs593769</b>  | 120869213 | T | C | 0.40 | 0.16        | 1           | 1           | 4.96 | 4.94 | 4.93 | 0.41 | 0.00        | 0.06        | 0.12        | 4.89 | 4.73 | 4.67 | 0.41  | <b>0.00</b> | <b>0.03</b> | <b>0.07</b> | 4.92 | 4.83 | 4.80 |
| rs12364988       | 120872836 | C | T | 0.49 | 0.18        | 1           | 1           | 4.91 | 4.99 | 4.89 | 0.47 | 0.00        | 0.13        | 0.28        | 4.72 | 4.68 | 4.85 | 0.48  | 0.00        | 0.07        | 0.15        | 4.80 | 4.83 | 4.88 |
| <b>rs668387</b>  | 120873131 | C | T | 0.43 | 0.14        | 1           | 1           | 4.97 | 4.95 | 4.92 | 0.44 | <b>0.00</b> | <b>0.02</b> | <b>0.03</b> | 4.88 | 4.72 | 4.66 | 0.44  | <b>0.00</b> | <b>0.01</b> | <b>0.02</b> | 4.92 | 4.83 | 4.79 |
| <b>rs923892</b>  | 120873373 | C | T | 0.43 | 0.17        | 1           | 1           | 4.96 | 4.95 | 4.92 | 0.44 | <b>0.00</b> | <b>0.02</b> | <b>0.03</b> | 4.88 | 4.72 | 4.66 | 0.44  | <b>0.00</b> | <b>0.01</b> | <b>0.03</b> | 4.92 | 4.83 | 4.79 |
| rs11218313       | 120888081 | A | G | 0.06 | 0.42        | 1           | 1           | 4.57 | 4.81 | 4.97 | 0.07 | 0.08        | 0.97        | 1           | 4.38 | 4.68 | 4.75 | 0.06  | 0.08        | 0.97        | 1           | NA   | NA   | NA   |
| rs12421319       | 120903720 | A | C | 0.04 | 0.93        | 1           | 1           | NA   | 4.97 | 4.95 | 0.04 | 0.15        | 1           | 1           | 6.00 | 4.50 | 4.75 | 0.04  | 0.24        | 1           | 1           | 6.00 | 4.72 | 4.85 |

|                  |           |   |   |      |      |      |   |      |      |      |      |      |      |      |      |      |      |       |      |      |      |      |      |      |
|------------------|-----------|---|---|------|------|------|---|------|------|------|------|------|------|------|------|------|------|-------|------|------|------|------|------|------|
| rs666004         | 120903788 | C | T | 0.47 | 0.30 | 1    | 1 | 4.95 | 4.96 | 4.89 | 0.49 | 0.02 | 0.58 | 1    | 4.84 | 4.69 | 4.73 | 0.48  | 0.01 | 0.44 | 1    | 4.89 | 4.82 | 4.81 |
| rs11501162       | 120905972 | C | T | 0.04 | 0.53 | 1    | 1 | NA   | 4.90 | 4.95 | 0.04 | 0.09 | 0.97 | 1    | 6.00 | 4.49 | 4.76 | 0.04  | 0.08 | 0.98 | 1    | 6.00 | 4.69 | 4.85 |
| rs10502262       | 120920522 | G | A | 0.27 | 0.30 | 1    | 1 | 5.10 | 4.97 | 4.90 | 0.26 | 0.06 | 0.94 | 1    | 4.67 | 4.69 | 4.78 | 0.26  | 0.47 | 1    | 1    | 4.85 | 4.83 | 4.83 |
| rs11218325       | 120921397 | T | G | 0.39 | 0.89 | 1    | 1 | 4.95 | 4.97 | 4.90 | 0.37 | 0.02 | 0.67 | 1    | 4.73 | 4.69 | 4.80 | 0.38  | 0.10 | 0.99 | 1    | 4.84 | 4.83 | 4.85 |
| rs7933552        | 120922038 | T | G | 0.43 | 0.98 | 1    | 1 | 4.98 | 4.94 | 4.92 | 0.40 | 0.00 | 0.19 | 0.44 | 4.66 | 4.72 | 4.81 | 0.42  | 0.03 | 0.75 | 1    | 4.81 | 4.83 | 4.86 |
| rs11218326       | 120922334 | G | A | 0.33 | 0.37 | 1    | 1 | 5.04 | 4.95 | 4.90 | 0.33 | 0.04 | 0.84 | 1    | 4.70 | 4.72 | 4.77 | 0.33  | 0.32 | 1    | 1    | 4.85 | 4.83 | 4.83 |
| rs11607927       | 120927179 | A | C | 0.05 | 0.46 | 1    | 1 | 4.00 | 4.95 | 4.95 | 0.05 | 0.26 | 1    | 1    | 5.00 | 4.88 | 4.73 | 0.047 | 0.84 | 1    | 1    | 4.25 | 4.91 | 4.83 |
| rs7131432        | 120932080 | A | T | 0.02 | 0.33 | 1    | 1 | NA   | 4.91 | 4.94 | 0.02 | 0.98 | 1    | 1    | 4.00 | 4.68 | 4.74 | 0.024 | 0.54 | 1    | 1    | 4.00 | 4.79 | 4.84 |
| rs11218340       | 120936564 | T | A | 0.06 | 0.84 | 1    | 1 | 6.00 | 4.90 | 4.94 | 0.07 | 0.65 | 1    | 1    | 4.50 | 4.83 | 4.72 | 0.066 | 0.68 | 1    | 1    | 5.00 | 4.86 | 4.83 |
| rs640479         | 120937693 | G | C | 0.47 | 0.09 | 1    | 1 | 5.06 | 4.93 | 4.91 | 0.44 | 0.06 | 0.93 | 1    | 4.74 | 4.78 | 4.67 | 0.45  | 0.01 | 0.53 | 1    | 4.89 | 4.85 | 4.78 |
| rs11218342       | 120939638 | T | C | 0.03 | 0.58 | 1    | 1 | NA   | 4.96 | 4.94 | 0.02 | 0.84 | 1    | 1    | 4.00 | 4.65 | 4.74 | 0.026 | 0.61 | 1    | 1    | 4.00 | 4.81 | 4.84 |
| rs10892756       | 120939766 | G | A | 0.06 | 0.84 | 1    | 1 | 6.00 | 4.90 | 4.94 | 0.07 | 0.55 | 1    | 1    | 4.50 | 4.85 | 4.72 | 0.067 | 0.60 | 1    | 1    | 5.00 | 4.87 | 4.83 |
| rs11218343       | 120940797 | T | C | 0.05 | 0.91 | 1    | 1 | NA   | 5.00 | 4.94 | 0.05 | 0.03 | 0.80 | 1    | 5.67 | 4.73 | 4.74 | 0.05  | 0.13 | 1    | 1    | 5.67 | 4.86 | 4.83 |
| rs11218346       | 120944391 | G | A | 0.06 | 0.84 | 1    | 1 | 6.00 | 4.90 | 4.94 | 0.07 | 0.55 | 1    | 1    | 4.50 | 4.85 | 4.72 | 0.067 | 0.60 | 1    | 1    | 5.00 | 4.87 | 4.83 |
| rs1792124        | 120946730 | C | T | 0.03 | 0.58 | 1    | 1 | NA   | 4.96 | 4.94 | 0.03 | 0.91 | 1    | 1    | 4.00 | 4.68 | 4.74 | 0.027 | 0.67 | 1    | 1    | 4.00 | 4.82 | 4.84 |
| rs1790213        | 120947399 | C | T | 0.44 | 0.07 | 0.96 | 1 | 5.00 | 4.97 | 4.87 | 0.40 | 0.42 | 1    | 1    | 4.69 | 4.78 | 4.70 | 0.419 | 0.08 | 0.97 | 1    | 4.84 | 4.88 | 4.78 |
| rs1699105        | 120947829 | T | C | 0.40 | 0.25 | 1    | 1 | 4.94 | 4.92 | 4.97 | 0.37 | 0.80 | 1    | 1    | 4.77 | 4.72 | 4.75 | 0.386 | 0.35 | 1    | 1    | 4.84 | 4.82 | 4.85 |
| rs924746         | 120948247 | T | C | 0.43 | 0.02 | 0.70 | 1 | 5.13 | 4.91 | 4.91 | 0.41 | 0.09 | 0.98 | 1    | 4.78 | 4.77 | 4.69 | 0.42  | 0.01 | 0.32 | 0.81 | 4.94 | 4.84 | 4.79 |
| <b>rs3781834</b> | 120951150 | T | C | 0.02 | 0.66 | 1    | 1 | NA   | 5.05 | 4.94 | 0.03 | 0.00 | 0.15 | 0.32 | 6.00 | 4.87 | 4.73 | 0.02  | 0.01 | 0.43 | 1    | 6.00 | 4.95 | 4.83 |
| rs4420280        | 120951269 | C | A | 0.37 | 0.04 | 0.83 | 1 | 5.14 | 4.93 | 4.90 | 0.33 | 0.12 | 1    | 1    | 4.76 | 4.76 | 4.71 | 0.35  | 0.01 | 0.47 | 1    | 4.94 | 4.85 | 4.80 |
| rs11218347       | 120951758 | T | C | 0.06 | 0.87 | 1    | 1 | 6.00 | 4.87 | 4.95 | 0.07 | 0.55 | 1    | 1    | 4.50 | 4.85 | 4.72 | 0.068 | 0.78 | 1    | 1    | 5.00 | 4.86 | 4.83 |
| rs3781836        | 120953548 | C | T | 0.13 | 0.89 | 1    | 1 | 5.33 | 4.83 | 4.96 | 0.12 | 0.00 | 0.20 | 0.47 | 5.11 | 4.82 | 4.71 | 0.12  | 0.05 | 0.89 | 1    | 5.17 | 4.83 | 4.83 |
| rs1699103        | 120957136 | G | A | 0.47 | 0.08 | 0.97 | 1 | 5.06 | 4.93 | 4.89 | 0.44 | 0.16 | 1    | 1    | 4.75 | 4.77 | 4.70 | 0.46  | 0.03 | 0.77 | 1    | 4.89 | 4.85 | 4.78 |
| rs7116734        | 120957150 | G | A | 0.45 | 0.02 | 0.61 | 1 | 5.11 | 4.91 | 4.89 | 0.42 | 0.11 | 1    | 1    | 4.78 | 4.77 | 4.69 | 0.43  | 0.01 | 0.33 | 0.85 | 4.93 | 4.84 | 4.78 |
| rs11218350       | 120957861 | A | T | 0.27 | 0.06 | 0.94 | 1 | 5.10 | 4.98 | 4.90 | 0.24 | 0.91 | 1    | 1    | 4.76 | 4.72 | 4.75 | 0.252 | 0.25 | 1    | 1    | 4.91 | 4.85 | 4.82 |
| rs11218351       | 120958917 | G | A | 0.06 | 0.94 | 1    | 1 | 6.00 | 4.88 | 4.95 | 0.07 | 0.40 | 1    | 1    | 4.67 | 4.85 | 4.72 | 0.063 | 0.59 | 1    | 1    | 5.00 | 4.86 | 4.83 |
| rs10892759       | 120969298 | G | A | 0.39 | 0.06 | 0.94 | 1 | 5.02 | 4.98 | 4.86 | 0.35 | 0.75 | 1    | 1    | 4.68 | 4.78 | 4.72 | 0.366 | 0.15 | 1    | 1    | 4.84 | 4.88 | 4.78 |
| rs1792113        | 120970156 | G | A | 0.40 | 0.06 | 0.92 | 1 | 5.02 | 4.98 | 4.86 | 0.35 | 0.79 | 1    | 1    | 4.68 | 4.78 | 4.72 | 0.372 | 0.14 | 1    | 1    | 4.85 | 4.88 | 4.78 |
| rs1620003        | 120978203 | A | G | 0.45 | 0.07 | 0.96 | 1 | 5.09 | 4.93 | 4.88 | 0.40 | 0.15 | 1    | 1    | 4.78 | 4.76 | 4.69 | 0.42  | 0.03 | 0.71 | 1    | 4.93 | 4.85 | 4.77 |
| rs11218360       | 120978601 | T | C | 0.02 | 0.71 | 1    | 1 | NA   | 5.00 | 4.94 | 0.03 | 0.05 | 0.89 | 1    | NA   | 4.96 | 4.73 | 0.02  | 0.24 | 1    | 1    | NA   | 4.98 | 4.83 |
| rs7128608        | 120978808 | T | C | 0.04 | 0.75 | 1    | 1 | NA   | 4.97 | 4.94 | 0.02 | 0.52 | 1    | 1    | NA   | 4.65 | 4.74 | 0.032 | 0.93 | 1    | 1    | NA   | 4.86 | 4.83 |

|            |           |   |   |      |      |      |      |      |      |      |      |      |      |    |      |      |      |       |      |      |      |      |      |      |
|------------|-----------|---|---|------|------|------|------|------|------|------|------|------|------|----|------|------|------|-------|------|------|------|------|------|------|
| rs17125523 | 120979449 | T | C | 0.02 | 0.71 | 1    | 1    | NA   | 5.00 | 4.94 | 0.02 | 0.04 | 0.84 | 1  | NA   | 4.96 | 4.73 | 0.02  | 0.21 | 1    | 1    | NA   | 4.98 | 4.83 |
| rs1629493  | 120982306 | A | G | 0.42 | 0.05 | 0.89 | 1    | 5.15 | 4.91 | 4.90 | 0.38 | 0.33 | 1    | 1  | 4.78 | 4.77 | 4.68 | 0.395 | 0.04 | 0.87 | 1    | 4.96 | 4.84 | 4.78 |
| rs2282648  | 120983705 | C | T | 0.33 | 0.03 | 0.77 | 1    | 5.10 | 4.96 | 4.88 | 0.32 | 0.70 | 1    | 1  | 4.79 | 4.74 | 4.72 | 0.326 | 0.09 | 0.98 | 1    | 4.94 | 4.85 | 4.80 |
| rs2282649  | 120984168 | C | T | 0.31 | 0.02 | 0.68 | 1    | 5.11 | 4.99 | 4.86 | 0.30 | 0.78 | 1    | 1  | 4.88 | 4.71 | 4.74 | 0.305 | 0.09 | 0.98 | 1    | 4.99 | 4.84 | 4.80 |
| rs726601   | 120986617 | C | T | 0.33 | 0.02 | 0.67 | 1    | 5.12 | 4.95 | 4.88 | 0.32 | 0.69 | 1    | 1  | 4.81 | 4.74 | 4.73 | 0.324 | 0.07 | 0.96 | 1    | 4.95 | 4.84 | 4.80 |
| rs1784931  | 120988148 | T | G | 0.44 | 0.06 | 0.93 | 1    | 5.09 | 4.94 | 4.87 | 0.40 | 0.19 | 1    | 1  | 4.78 | 4.76 | 4.70 | 0.420 | 0.03 | 0.72 | 1    | 4.93 | 4.85 | 4.77 |
| rs1010159  | 120988611 | T | C | 0.38 | 0.03 | 0.76 | 1    | 5.13 | 4.94 | 4.89 | 0.35 | 0.81 | 1    | 1  | 4.75 | 4.76 | 4.71 | 0.364 | 0.10 | 1    | 1    | 4.94 | 4.85 | 4.79 |
| rs1010158  | 120988861 | T | C | 0.33 | 0.04 | 0.82 | 1    | 5.10 | 4.96 | 4.88 | 0.32 | 0.63 | 1    | 1  | 4.79 | 4.75 | 4.72 | 0.326 | 0.08 | 0.97 | 1    | 4.94 | 4.85 | 4.80 |
| rs1614735  | 120998211 | T | G | 0.47 | 0.19 | 1    | 1    | 4.94 | 4.91 | 5.01 | 0.47 | 0.52 | 1    | 1  | 4.70 | 4.76 | 4.74 | 0.470 | 0.19 | 1    | 1    | 4.81 | 4.83 | 4.87 |
| rs17125558 | 120999237 | C | T | 0.02 | 0.77 | 1    | 1    | NA   | 4.69 | 4.95 | 0.03 | 0.73 | 1    | 1  | NA   | 4.73 | 4.74 | 0.023 | 0.66 | 1    | 1    | NA   | 4.71 | 4.84 |
| rs10790448 | 121000765 | G | A | 0.40 | 0.51 | 1    | 1    | 5.04 | 4.91 | 4.94 | 0.45 | 0.53 | 1    | 1  | 4.76 | 4.75 | 4.71 | 0.425 | 0.38 | 1    | 1    | 4.88 | 4.82 | 4.83 |
| rs10892761 | 121003094 | A | G | 0.40 | 0.46 | 1    | 1    | 5.05 | 4.91 | 4.94 | 0.44 | 0.23 | 1    | 1  | 4.80 | 4.75 | 4.69 | 0.416 | 0.18 | 1    | 1    | 4.90 | 4.83 | 4.82 |
| rs540860   | 121036098 | C | T | 0.47 | 0.28 | 1    | 1    | 4.92 | 4.88 | 5.05 | 0.48 | 0.03 | 0.78 | 1  | 4.70 | 4.72 | 4.83 | 0.48  | 0.02 | 0.67 | 1    | 4.81 | 4.80 | 4.94 |
| rs663175   | 121039037 | A | G | 0.47 | 0.44 | 1    | 1    | 4.96 | 4.88 | 5.05 | 0.49 | 0.02 | 0.62 | 1  | 4.67 | 4.72 | 4.83 | 0.48  | 0.03 | 0.72 | 1    | 4.81 | 4.80 | 4.94 |
| rs647905   | 121040148 | T | C | 0.47 | 0.40 | 1    | 1    | 4.95 | 4.88 | 5.05 | 0.49 | 0.02 | 0.68 | 1  | 4.67 | 4.73 | 4.82 | 0.48  | 0.03 | 0.72 | 1    | 4.80 | 4.80 | 4.93 |
| rs568599   | 121041221 | C | G | 0.48 | 0.33 | 1    | 1    | 4.95 | 4.88 | 5.06 | 0.50 | 0.02 | 0.52 | 1  | 4.68 | 4.72 | 4.85 | 0.49  | 0.01 | 0.53 | 1    | 4.80 | 4.80 | 4.96 |
| rs531294   | 121045852 | T | C | 0.49 | 0.13 | 1    | 1    | 4.84 | 4.95 | 4.99 | 0.49 | 0.20 | 1    | 1  | 4.73 | 4.73 | 4.75 | 0.488 | 0.06 | 0.92 | 1    | 4.78 | 4.84 | 4.87 |
| rs11218381 | 121067926 | A | G | 0.44 | 0.01 | 0.31 | 0.79 | 4.87 | 4.86 | 5.10 | 0.42 | 0.09 | 1    | 1  | 4.76 | 4.70 | 4.78 | 0.43  | 0.00 | 0.17 | 0.37 | 4.81 | 4.78 | 4.93 |
| rs10502260 | 121073107 | C | T | 0.29 | 0.01 | 0.53 | 1    | 4.95 | 4.79 | 5.05 | 0.31 | 0.52 | 1    | 1  | 4.89 | 4.70 | 4.74 | 0.303 | 0.03 | 0.80 | 1    | 4.92 | 4.74 | 4.90 |
| rs17337279 | 121073326 | G | A | 0.01 | 0.07 | 0.95 | 1    | NA   | 5.31 | 4.93 | NA   | NA   | NA   | NA | NA   | NA   | NA   | 0.01  | 0.24 | 1    | 1    | NA   | 5.00 | 4.84 |
| rs2887763  | 121073389 | G | A | 0.48 | 0.02 | 0.58 | 1    | 4.85 | 4.91 | 5.08 | 0.46 | 0.04 | 0.85 | 1  | 4.71 | 4.74 | 4.76 | 0.47  | 0.00 | 0.17 | 0.36 | 4.77 | 4.82 | 4.91 |
| rs10892771 | 121073472 | G | A | 0.50 | 0.04 | 0.87 | 1    | 4.87 | 4.91 | 5.08 | 0.48 | 0.02 | 0.53 | 1  | 4.71 | 4.72 | 4.81 | 0.49  | 0.00 | 0.15 | 0.33 | 4.78 | 4.81 | 4.93 |
| rs540824   | 121080068 | T | C | 0.24 | 0.34 | 1    | 1    | 5.27 | 4.91 | 4.94 | 0.24 | 0.96 | 1    | 1  | 4.70 | 4.80 | 4.70 | 0.240 | 0.45 | 1    | 1    | 4.96 | 4.85 | 4.81 |
| rs1074086  | 121080305 | A | G | 0.28 | 0.71 | 1    | 1    | 5.00 | 4.91 | 4.95 | 0.28 | 0.47 | 1    | 1  | 4.58 | 4.77 | 4.72 | 0.281 | 0.49 | 1    | 1    | 4.78 | 4.84 | 4.83 |
| rs662333   | 121084155 | T | C | 0.24 | 0.28 | 1    | 1    | 5.27 | 4.91 | 4.93 | 0.24 | 0.75 | 1    | 1  | 4.70 | 4.82 | 4.69 | 0.240 | 0.29 | 1    | 1    | 4.96 | 4.86 | 4.80 |
| rs540029   | 121089627 | A | G | 0.24 | 0.37 | 1    | 1    | 5.27 | 4.90 | 4.94 | 0.24 | 0.83 | 1    | 1  | 4.76 | 4.79 | 4.70 | 0.238 | 0.40 | 1    | 1    | 5.00 | 4.84 | 4.82 |
| rs618048   | 121089783 | A | T | 0.24 | 0.37 | 1    | 1    | 5.27 | 4.90 | 4.94 | 0.24 | 0.83 | 1    | 1  | 4.76 | 4.79 | 4.70 | 0.238 | 0.40 | 1    | 1    | 5.00 | 4.84 | 4.82 |
| rs10790452 | 121090141 | A | G | 0.28 | 0.82 | 1    | 1    | 5.12 | 4.90 | 4.95 | 0.27 | 0.49 | 1    | 1  | 4.74 | 4.74 | 4.74 | 0.277 | 0.82 | 1    | 1    | 4.93 | 4.82 | 4.84 |
| rs92061    | 121093256 | T | C | 0.23 | 0.45 | 1    | 1    | 5.26 | 4.91 | 4.94 | 0.23 | 0.60 | 1    | 1  | 4.77 | 4.80 | 4.70 | 0.232 | 0.34 | 1    | 1    | 5.00 | 4.85 | 4.81 |

**position:** in base pairs according to NCBI build 36.3; **MAF:** minor allele frequency; **mean:** mean value of hippocampal volume in cc; **NA:** Not Available; **11,12,22:** genotypes based on alleles 1 and 2
