# Supplementary material for: Association of the Alzheimer's Gene SORL1 With Hippocampal Volume in Young, Healthy Adults
Source: Atypon-hosted journal article supplement (doi:10.1176/appi.ajp.2011.10101509), 2011-07-06
Supplement: ajp_168_10_1083_02.pdf [file ajp_168_10_1083_02.pdf]

**Supplementary Table 2.** *SORL1* 3-SNP sliding window haplotype associations with hippocampal volume in the combined sample.

| SNP Number | SNP             | Position*        | SNP type† | Haplotype Number¶ | Global p | Max p           |
|------------|-----------------|------------------|-----------|-------------------|----------|-----------------|
| 1          | rs6589878       | 120728302        | UP        | 1                 | 8.07E-01 | 8.54E-01        |
| 2          | rs4936618       | 120729206        | UP        | 2                 | 7.19E-01 | 7.45E-01        |
| 3          | rs891437        | 120729986        | UP        | 3                 | 7.04E-01 | 8.63E-01        |
| 4          | rs12417012      | 120731232        | UP        | 4                 | 7.77E-01 | 8.42E-01        |
| 5          | rs2043107       | 120735412        | UP        | 5                 | 9.20E-01 | 8.59E-01        |
| 6          | rs10750187      | 120735435        | UP        | 6                 | 8.89E-01 | 7.98E-01        |
| 7          | rs4936621       | 120738021        | UP        | 7                 | 7.74E-01 | 7.97E-01        |
| 8          | rs10790443      | 120739341        | UP        | 8                 | 7.98E-01 | 7.86E-01        |
| 9          | rs10790444      | 120740339        | UP        | 9                 | 7.02E-01 | 6.61E-01        |
| 10         | rs1529578       | 120740881        | UP        | 10                | 8.53E-01 | 7.86E-01        |
| 11         | rs1529579       | 120741081        | UP        | 11                | 5.15E-01 | 4.45E-01        |
| 12         | rs4935769       | 120742044        | UP        | 12                | 1.72E-01 | 3.49E-01        |
| 13         | rs4936625       | 120742455        | UP        | 13                | 4.32E-01 | 4.37E-01        |
| 14         | rs72991         | 120748926        | UP        | 14                | 7.46E-01 | 8.46E-01        |
| 15         | rs733435        | 120748971        | UP        | 15                | 6.06E-01 | 5.72E-01        |
| 16         | rs297526        | 120749220        | UP        | 16                | 5.15E-01 | 3.41E-01        |
| 17         | rs7116595       | 120751341        | UP        | 17                | 5.20E-02 | 4.62E-01        |
| 18         | rs297491        | 120760534        | UP        | 18                | 4.98E-01 | 4.86E-01        |
| 19         | rs6589880       | 120760909        | UP        | 19                | 6.47E-01 | 5.44E-01        |
| 20         | rs212501        | 120761319        | UP        | 20                | 5.20E-01 | 4.97E-01        |
| 21         | rs297487        | 120762304        | UP        | 21                | 5.23E-01 | 5.14E-01        |
| 22         | rs2370386       | 120763628        | UP        | 22                | 4.50E-02 | 7.20E-02        |
| 23         | rs903243        | 120764316        | UP        | 23                | 9.90E-02 | 2.32E-01        |
| 24         | rs2453146       | 120764691        | UP        | 24                | 3.44E-01 | 6.78E-01        |
| 25         | rs662738        | 120765567        | UP        | 25                | 2.31E-01 | 2.13E-01        |
| 26         | rs297502        | 120769026        | UP        | 26                | 4.33E-01 | 4.55E-01        |
| 27         | rs297503        | 120769636        | UP        | 27                | 7.29E-01 | 6.48E-01        |
| 28         | rs747220        | 120769768        | UP        | 28                | 2.46E-01 | 1.19E-01        |
| 29         | rs12290188      | 120771229        | UP        | 29                | 2.19E-01 | 1.97E-01        |
| 30         | rs297505        | 120772695        | UP        | 30                | 3.54E-01 | 2.08E-01        |
| 31         | rs297510        | 120777056        | UP        | 31                | 3.03E-01 | 8.99E-01        |
| 32         | rs297511        | 120777561        | UP        | 32                | 7.50E-02 | 2.99E-01        |
| 33         | rs297513        | 120780516        | UP        | 33                | 1.10E-01 | 2.61E-01        |
| 34         | rs297517        | 120799570        | UP        | 34                | 3.26E-01 | 2.30E-01        |
| 35         | rs17125331      | 120807029        | UP        | 35                | 5.92E-01 | 4.00E-01        |
| 36         | rs17125333      | 120807856        | UP        | 36                | 2.37E-01 | 6.60E-02        |
| 37         | rs17125336      | 120808416        | UP        | 37                | 2.53E-01 | 1.08E-01        |
| 38         | rs17125342      | 120813518        | UP        | 38                | 2.37E-01 | 1.82E-01        |
| 39         | rs668053        | 120813735        | UP        | 39                | 1.98E-01 | 1.86E-01        |
| 40         | rs11218292      | 120815774        | UP        | 40                | 2.32E-01 | 2.48E-01        |
| 41         | rs4935774       | 120826964        | UP        | 41                | 4.00E-02 | 2.12E-01        |
| <b>42</b>  | <b>rs661057</b> | <b>120834164</b> | ON        | <b>42</b>         | 9.80E-02 | <b>4.20E-02</b> |

|           |                   |                  |    |           |          |          |
|-----------|-------------------|------------------|----|-----------|----------|----------|
| 43        | rs3862605         | 120834251        | ON | 43        | 3.59E-01 | 3.22E-01 |
| 44        | rs1784934         | 120843203        | ON | 44        | 3.31E-01 | 2.67E-01 |
| 45        | rs676160          | 120845443        | ON | 45        | 1.95E-01 | 2.01E-01 |
| 46        | rs3781826         | 120848256        | ON | 46        | 5.00E-02 | 3.20E-02 |
| 47        | rs12276905        | 120861389        | ON | 47        | 5.90E-02 | 2.90E-02 |
| 48        | rs676759          | 120864475        | ON | 48        | 5.75E-02 | 2.50E-02 |
| <b>49</b> | <b>rs560573</b>   | <b>120866094</b> | ON | <b>49</b> | 2.70E-02 | 1.29E-02 |
| 50        | rs2298525         | 120866225        | ON | 50        | 4.30E-02 | 2.60E-02 |
| 51        | rs985421          | 120867526        | ON | 51        | 7.10E-02 | 4.00E-02 |
| 52        | rs593769          | 120869213        | ON | 52        | 1.00E-01 | 2.70E-02 |
| 53        | rs12364988        | 120872836        | ON | 53        | 2.80E-02 | 1.80E-02 |
| <b>54</b> | <b>rs668387</b>   | <b>120873131</b> | ON | <b>54</b> | 2.70E-02 | 1.70E-02 |
| 55        | rs923892          | 120873373        | ON | 55        | 4.70E-02 | 4.10E-02 |
| 56        | rs11218313        | 120888081        | ON | 56        | 1.04E-01 | 4.50E-02 |
| 57        | rs12421319        | 120903720        | ON | 57        | 6.50E-02 | 4.30E-02 |
| 58        | rs666004          | 120903788        | ON | 58        | 9.90E-02 | 8.80E-02 |
| 59        | rs11501162        | 120905972        | ON | 59        | 2.22E-01 | 2.20E-01 |
| 60        | rs10502262        | 120920522        | ON | 60        | 3.10E-01 | 2.31E-01 |
| 61        | rs11218325        | 120921397        | ON | 61        | 2.92E-01 | 2.43E-01 |
| 62        | rs7933552         | 120922038        | ON | 62        | 3.18E-01 | 2.08E-01 |
| 63        | rs11218326        | 120922334        | ON | 63        | 7.09E-01 | 7.49E-01 |
| 64        | rs11607927        | 120927179        | ON | 64        | 9.17E-01 | 8.44E-01 |
| 65        | rs7131432         | 120932080        | ON | 65        | 3.27E-02 | 1.90E-02 |
| <b>66</b> | <b>rs11218340</b> | <b>120936564</b> | ON | <b>66</b> | 6.84E-02 | 1.80E-02 |
| 67        | rs640479          | 120937693        | ON | 67        | 6.40E-02 | 1.70E-02 |
| 68        | rs11218342        | 120939638        | ON | 68        | 1.75E-01 | 1.03E-01 |
| 69        | rs10892756        | 120939766        | ON | 69        | 6.14E-01 | 5.45E-01 |
| 70        | rs11218343        | 120940797        | ON | 70        | 3.33E-01 | 1.65E-01 |
| 71        | rs11218346        | 120944391        | ON | 71        | 1.20E-01 | 1.05E-01 |
| 72        | rs1792124         | 120946730        | ON | 72        | 1.48E-01 | 1.23E-01 |
| 73        | rs1790213         | 120947399        | ON | 73        | 2.40E-02 | 1.32E-01 |
| 74        | rs1699105         | 120947829        | ON | 74        | 7.55E-03 | 7.82E-02 |
| 75        | rs924746          | 120948247        | ON | 75        | 2.37E-02 | 1.55E-02 |
| 76        | rs3781834         | 120951150        | ON | 76        | 1.19E-02 | 3.00E-02 |
| 77        | rs4420280         | 120951269        | ON | 77        | 6.50E-02 | 2.80E-02 |
| 78        | rs11218347        | 120951758        | ON | 78        | 1.83E-01 | 9.40E-02 |
| 79        | rs3781836         | 120953548        | ON | 79        | 9.20E-02 | 8.40E-02 |
| 80        | rs1699103         | 120957136        | ON | 80        | 7.30E-02 | 8.30E-02 |
| 81        | rs7116734         | 120957150        | ON | 81        | 1.26E-01 | 3.10E-02 |
| 82        | rs11218350        | 120957861        | ON | 82        | 4.07E-01 | 2.83E-01 |
| 83        | rs11218351        | 120958917        | ON | 83        | 4.95E-01 | 3.03E-01 |
| 84        | rs10892759        | 120969298        | ON | 84        | 7.00E-02 | 3.70E-02 |
| 85        | rs1792113         | 120970156        | ON | 85        | 1.13E-02 | 1.14E-01 |
| 86        | rs1620003         | 120978203        | ON | 86        | 1.69E-01 | 6.10E-02 |
| 87        | rs11218360        | 120978601        | ON | 87        | 5.90E-01 | 4.46E-01 |
| 88        | rs7128608         | 120978808        | ON | 88        | 1.54E-01 | 9.90E-02 |

|           |                  |                  |      |           |          |          |
|-----------|------------------|------------------|------|-----------|----------|----------|
| 89        | rs17125523       | 120979449        | ON   | 89        | 2.50E-02 | 7.00E-02 |
| 90        | rs1629493        | 120982306        | ON   | 90        | 7.70E-02 | 6.30E-02 |
| 91        | rs2282648        | 120983705        | ON   | 91        | 7.00E-02 | 4.30E-02 |
| <b>92</b> | <b>rs2282649</b> | <b>120984168</b> | ON   | <b>92</b> | 1.94E-01 | 5.40E-02 |
| 93        | rs726601         | 120986617        | ON   | 93        | 8.10E-02 | 4.80E-02 |
| 94        | rs1784931        | 120988148        | ON   | 94        | 1.37E-01 | 7.50E-02 |
| <b>95</b> | <b>rs1010159</b> | <b>120988611</b> | ON   | <b>95</b> | 3.34E-01 | 1.42E-01 |
| 96        | rs1010158        | 120988861        | ON   | 96        | 1.73E-01 | 1.41E-01 |
| <b>97</b> | <b>rs1614735</b> | <b>120998211</b> | ON   | <b>97</b> | 4.51E-01 | 2.42E-01 |
| 98        | rs17125558       | 120999237        | ON   | 98        | 1.06E-01 | 8.30E-02 |
| 99        | rs10790448       | 121000765        | ON   | 99        | 1.96E-03 | 1.23E-02 |
| 100       | rs10892761       | 121003094        | ON   | 100       | 5.81E-03 | 9.48E-03 |
| 101       | rs540860         | 121036098        | DOWN | 101       | 5.68E-03 | 8.70E-04 |
| 102       | rs663175         | 121039037        | DOWN | 102       | 4.00E-03 | 1.23E-03 |
| 103       | rs647905         | 121040148        | DOWN | 103       | 2.63E-02 | 1.12E-02 |
| 104       | rs568599         | 121041221        | DOWN | 104       | 3.59E-02 | 1.04E-02 |
| 105       | rs531294         | 121045852        | DOWN | 105       | 1.28E-01 | 2.20E-02 |
| 106       | rs11218381       | 121067926        | DOWN | 106       | 3.01E-02 | 5.52E-03 |
| 107       | rs10502260       | 121073107        | DOWN | 107       | 1.00E-03 | 7.72E-03 |
| 108       | rs17337279       | 121073326        | DOWN | 108       | 3.40E-03 | 7.50E-04 |
| 109       | rs2887763        | 121073389        | DOWN | 109       | 1.10E-03 | 8.80E-04 |
| 110       | rs10892771       | 121073472        | DOWN | 110       | 9.27E-03 | 8.93E-03 |
| 111       | rs540824         | 121080068        | DOWN | 111       | 3.69E-01 | 2.46E-01 |
| 112       | rs1074086        | 121080305        | DOWN | 112       | 3.59E-01 | 2.39E-01 |
| 113       | rs662333         | 121084155        | DOWN | 113       | 7.71E-01 | 9.74E-01 |
| 114       | rs540029         | 121089627        | DOWN | 114       | 2.46E-01 | 1.64E-01 |
| 115       | rs618048         | 121089783        | DOWN | 115       | 2.40E-01 | 1.69E-01 |
| 116       | rs10790452       | 121090141        | DOWN |           |          |          |
| 117       | rs92061          | 121093256        | DOWN |           |          |          |

\*Position in base pairs according to NCBI build 36.3; † Describes if the SNP is upstream of *SORL1* (UP), within *SORL1* (ON) or downstream of *SORL1* (DOWN); ¶ 3-SNP haplotype number, starting from SNP number one. Each haplotype is created by the numbered SNP plus the two after it in positional order, i.e. HAP 1 = rs6589878, rs4936618 and rs891437; **Bold SNP** names show the SNPs in haplotypes previously reported associated with AD by Cuenco et al.; **Global p** measures significance of the entire set of haplotypes for the locus subset. **Max p** shows the permuted p-value and the [redacted] in the last column indicate that the haplotype is associated with hippocampal volume ( $p \leq 0.05$ ). Compared to the discovery cohort, 1 SNP did not reach a call rate of 95% and 1 SNP showed a frequency of less than 1% in the replication sample.
