# Supplementary material for: Association of the Alzheimer's Gene SORL1 With Hippocampal Volume in Young, Healthy Adults
Source: Atypon-hosted journal article supplement (doi:10.1176/appi.ajp.2011.10101509), 2011-07-06
Supplement: ajp_168_10_1083_03.pdf [file ajp_168_10_1083_03.pdf]

**Supplementary Table 3.** Gene-wide association p-values between *SORL1* and hippocampal volume with and without adjustment for scanner protocol

|                           | <b>Without scanner protocols<sup>*</sup></b> | <b>With scanner protocols</b> |
|---------------------------|----------------------------------------------|-------------------------------|
| <b>Discovery sample</b>   | 0,04                                         | 0,0362                        |
| <b>Replication sample</b> | 0,009                                        | 0,0115                        |
| <b>Combined sample</b>    | 0,002                                        | 0,0017                        |

<sup>\*</sup> The covariate for field strength was used solely on the combined analyses
