# Supplementary material for: Association of the Alzheimer's Gene SORL1 With Hippocampal Volume in Young, Healthy Adults
Source: Atypon-hosted journal article supplement (doi:10.1176/appi.ajp.2011.10101509), 2011-07-06
Supplement: ajp_168_10_1083_04.pdf [file ajp_168_10_1083_04.pdf]

**Supplementary Figure 1.** *SORL1* 3-SNP sliding window haplotype associations with hippocampal volume in the combined sample.

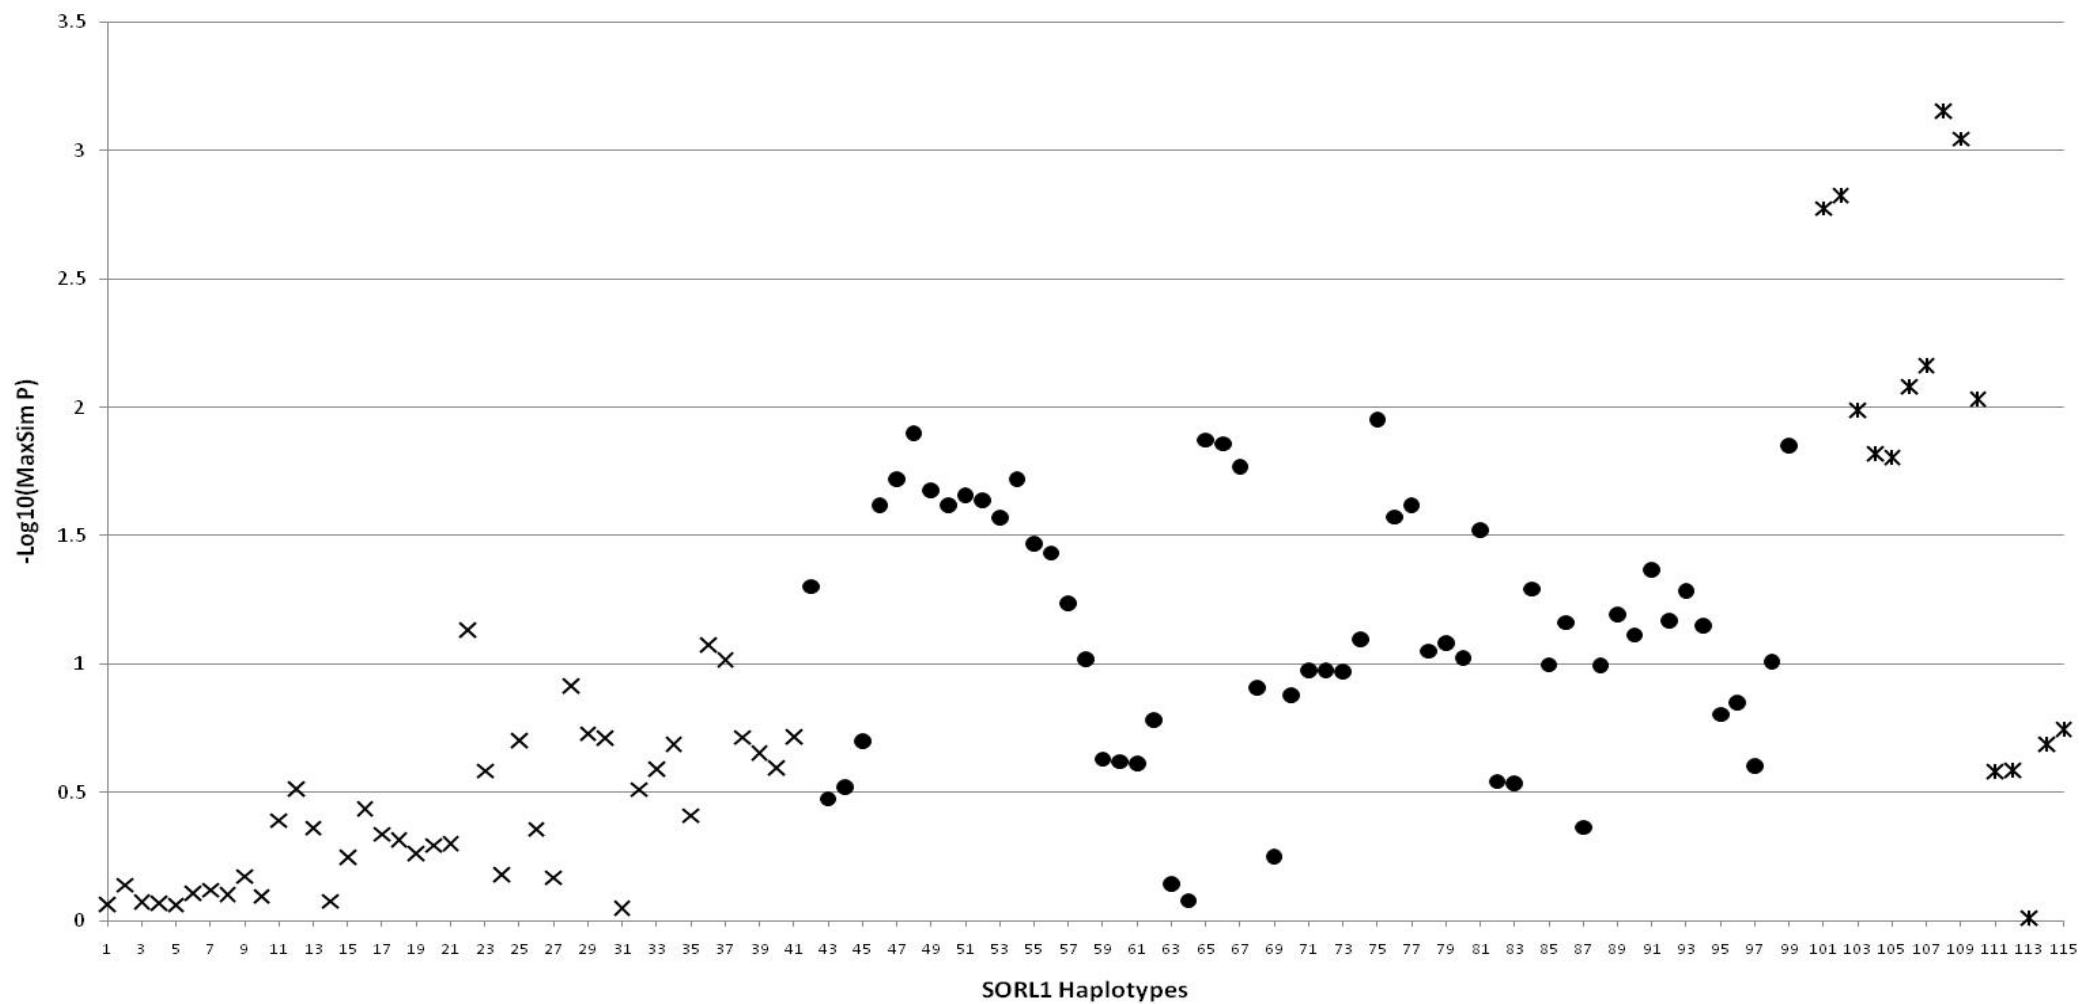

x Represent SNPs Upstream of *SORL1*, • Represent SNPs within *SORL1*, ⌘ Represent SNPs downstream of *SORL1*; y-axis shows the  $-\log_{10}$  of the maximum score p-value, dashed line indicates a p-value=0.05, dotted line indicates p-value=0.01.
